1 **Japanica Array NEO with increased genome-wide coverage and abundant disease risk SNPs**

2

3 Mika Sakurai-Yageta<sup>1,2†</sup>, Kazuki Kumada<sup>1,2†</sup>, Chinatsu Gocho<sup>1</sup>, Satoshi Makino<sup>1</sup>, Akira Uruno<sup>1,3</sup>, Shu  
4 Tadaka<sup>1</sup>, Ikuko N Motoike<sup>1,4</sup>, Masae Kimura<sup>1</sup>, Shin Ito<sup>1</sup>, Akihito Otsuki<sup>1,3</sup>, Akira Narita<sup>1</sup>, Hisaaki  
5 Kudo<sup>1</sup>, Yuichi Aoki<sup>1,4</sup>, Inaho Danjoh<sup>1</sup>, Jun Yasuda<sup>1</sup>, Hiroshi Kawame<sup>1</sup>, Naoko Minegishi<sup>1,2</sup>, Seizo  
6 Koshiba<sup>1,2</sup>, Nobuo Fuse<sup>1,2,3</sup>, Gen Tamiya<sup>1,2</sup>, Masayuki Yamamoto<sup>1,2,3\*</sup>, and Kengo Kinoshita<sup>1,2,4\*</sup>

7

8

9 <sup>1</sup>Tohoku Medical Megabank Organization, Tohoku University, 2-1 Seiryomachi, Aoba-ku, Sendai,  
10 Miyagi 980-8573, Japan

11 <sup>2</sup>Tohoku University Advanced Research Center for Innovations in Next-Generation Medicine, Tohoku  
12 University, 2-1 Seiryomachi, Aoba-ku, Sendai, Miyagi 980-8573, Japan

13 <sup>3</sup>Graduate School of Medicine, Tohoku University, 2-1 Seiryomachi, Aoba-ku, Sendai, Miyagi 980-  
14 8575, Japan

15 <sup>4</sup>Graduate School of Information Sciences, Tohoku University, 6-3-09 Aramaki-Aza-Aoba, Aoba-ku,  
16 Sendai, Miyagi 980-8579, Japan

17

18

19 \*Correspondence: [masiyamamoto@med.tohoku.ac.jp](mailto:masiyamamoto@med.tohoku.ac.jp), [kengo@ecei.tohoku.ac.jp](mailto:kengo@ecei.tohoku.ac.jp)

20 †Mika Sakurai-Yageta and Kazuki Kumada contributed equally to this work.

21

22

1 **Abstract**

2 **Background:** Increasing the power of genome-wide association studies in diverse populations is  
3 important for understanding the genetic determinants of disease risks, and large-scale genotype data  
4 are collected by genome cohort and biobank projects all over the world. In particular, ethnic-specific  
5 SNP arrays are becoming more important because the use of universal SNP arrays has some limitations  
6 in terms of cost-effectiveness and throughput. As part of the Tohoku Medical Megabank Project, which  
7 integrates prospective genome cohorts into a biobank, we have been developing a series of Japonica  
8 Arrays for genotyping participants based on reference panels constructed from whole-genome  
9 sequence data of the Japanese population.

10 **Results:** We designed a novel version of the SNP Array for the Japanese population, called Japonica  
11 Array NEO, comprising a total of 666,883 SNPs, including tag SNPs of autosomes and X chromosome  
12 with pseudoautosomal regions, SNPs of Y chromosome and mitochondria, and known disease risk  
13 SNPs. Among them, 654,246 tag SNPs were selected from an expanded reference panel of 3,552  
14 Japanese using pairwise  $r^2$  of linkage disequilibrium measures. Moreover, 28,298 SNPs were included  
15 for the evaluation of previously identified disease risk SNPs from the literature and databases, and  
16 those present in the Japanese population were extracted using the reference panel. The imputation  
17 performance of Japonica Array NEO was assessed by genotyping 286 Japanese samples. We found  
18 that the imputation quality  $r^2$  and INFO score in the minor allele frequency bin  $>2.5\%$ – $5\%$  were  $>0.9$

1 and >0.8, respectively, and >12 million markers were imputed with an INFO score >0.8. After  
2 verification, Japonica Arrays were used to efficiently genotype cohort participants from the sample  
3 selection to perform a quality assessment of the raw data; approximately 130,000 genotyping data of  
4 >150,000 participants has already been obtained.

5 **Conclusions:** Japonica Array NEO is a promising tool for genotyping the Japanese population with  
6 genome-wide coverage, contributing to the development of genetic risk scores for this population and  
7 further identifying disease risk alleles among individuals of East Asian ancestry.

8

9 **Keywords:** ethnic-specific SNP array, genome-wide coverage, genotype imputation, disease risk  
10 alleles, genome cohort, biobank

11

## 1 **Background**

2           The Tohoku Medical Megabank (TMM) Project was launched as part of reconstruction efforts  
3 following the Great East Japan Earthquake on March 11, 2011, and aims to establish a next-generation  
4 medical system for precision medicine and personalized healthcare [1]. To accomplish the purpose,  
5 we have been conducting prospective genome cohort studies in connection with the establishment of  
6 an integrated biobank. Between 2013 and 2017, the Tohoku Medical Megabank Organization  
7 (ToMMo) and the Iwate Tohoku Medical Megabank Organization recruited 157,602 participants and  
8 conducted a baseline assessment, including the collection of biospecimens in Miyagi and Iwate  
9 Prefectures. The study population comprised two cohorts: the TMM Community-Based Cohort Study  
10 (TMM CommCohort Study) cohort, consisting of 84,073 adults [2], and the TMM Birth and Three-  
11 Generation Cohort Study (TMM BirThree Cohort Study) cohort, consisting of 73,529 pregnant women  
12 and their family members [3].

13           We have performed genome/omics analyses within the TMM project and established an  
14 integrated biobank that includes biospecimens, health and clinical information, and genome/omics  
15 data to develop a research infrastructure for genomic medicine [4]. Taking advantage of the two  
16 abovementioned cohorts, we planned a strategy for genomic analysis as follows: development of a  
17 whole-genome reference panel using the TMM CommCohort, large-scale genotyping and genotype  
18 imputation of both cohorts, and collection of accurate haplotype information from the TMM BirThree

1 Cohort. Based on this strategy, we first established an allele frequency panel called 1KJPN, which  
2 includes the whole-genome sequencing (WGS) data of 1,070 participants [5]. The reference panel was  
3 sequentially expanded to the latest version, 3.5KJPNv2, which consists of 3,342 and 210 samples from  
4 the participants of the TMM project and other cohorts in western Japan, respectively [6]. Based on the  
5 updated reference panel, we have developed and refined custom single nucleotide polymorphism  
6 (SNP) arrays for genotyping all 157,602 participants, as described below.

7 The International HapMap and the 1000 Genomes Project have shown that human genomes  
8 comprise regions with an extended linkage disequilibrium (LD) and of limited haplotype diversity,  
9 depending on the population [7, 8], and that SNPs within regions could be inferred from genotypes of  
10 a smaller number of SNPs. Carlson *et al.* showed that the selection algorithms of the set of SNPs for  
11 genotyping (referred to as tag SNPs) based on the  $r^2$ , which are widely used for pairwise LD measures  
12 using reference genome sequences from different populations [9]. Using tag SNPs, untyped sites can  
13 be complemented by genotype imputation using a reference genome to increase the number of SNPs  
14 that can be used for further association studies [10, 11]. In large-scale multi-ethnic studies, four kinds  
15 of ethnic-specific SNP arrays were first designed for European, East Asian, African American, and  
16 Latino populations with simulations of genotype imputation [12, 13]. Similarly, biobanks and/or  
17 cohort projects developed ethnic-specific SNP arrays, such as the UK biobank Axiom Array [14], the  
18 Axiom-NL Array based on GoNL reference data in Netherlands [15], and the Axiom Array for Finnish

1 of the FinnGen project. In East Asia, ethnic-specific custom arrays were also developed by the Taiwan  
2 Biobank as the TWB Array, based on the Axiom Genome-Wide CHB 1 Array [16]; by the Korean  
3 biobank as Axiom KoreanChip, based on 2,576 WGS data [17]; and by the Axiom China Kadoorie  
4 Biobank Array [18].

5 Most of these large-scale projects adopted the Axiom system because of the flexibility of the  
6 manufacturing array, the highly automated assay process, and the robust sample tracking with a 96-  
7 array layout. Concurrent with the trend toward developing ethnic arrays, we also selected the Axiom  
8 system to design a Japanese-specific SNP array (the Japonica Array). We designed the first version of  
9 the Japonica Array (JPAv1) in 2014 [19]. JPAv1 contains tag SNPs selected by means of a statistical  
10 measure called ‘mutual information’ with minor allele frequency (MAF)  $\geq 0.5\%$  to cover rare variants  
11 from a reference panel comprising 1,070 Japanese genomes, and a number of characterized SNPs from  
12 the genome-wide association studies (GWAS) catalog plus some other databases. In 2017, we updated  
13 JPAv1 and developed the second version (JPAv2) by increasing non-tag SNPs, such as human  
14 leukocyte antigen (HLA), killer cell immunoglobulin-like receptor (KIR) regions, and Y chromosome,  
15 and by replacing markers that were not working in JPAv1. Genotyping of TMM participants was  
16 conducted primarily with JPAv2 until 2018.

17 To enhance direct genotyping of previously identified disease risk variants and to obtain  
18 maximum genomic coverage with the expanded whole-genome reference panel including nearly 4,000

1 Japanese individuals [6], we aimed to design a novel and substantially revised version of the Japonica  
2 Array, which we call Japonica Array NEO (JPA NEO). In this paper, we describe how we have  
3 improved upon JPAv2 to create JPA NEO. Of the various improvements, one salient point is that we  
4 have changed the selection algorithm for tag SNPs from using the mutual information criteria to the  
5 global standard of using  $r^2$  of the LD measure, aiming to improve imputation accuracy and to  
6 standardize the data for use in meta-analyses conducted anywhere in the world. We also report the  
7 progress of genotyping TMM participants by using all three versions of the Japonica Array.

8

9

## 10 **Results**

### 11 *Tag SNP selection for improved genome-wide coverage*

12 In JPA NEO, our updated version of the Japonica Array, we used the maximum number on a  
13 single array of the Axiom 96-array layout, and the total of nearly 670,000 markers were divided into  
14 about 650,000 tag SNPs and tens of thousands of disease-related markers. The selection process of  
15 JPA NEO is essentially the same as previous versions of the Japonica Array. However, we have  
16 selected these markers by using the latest version of our genome reference panel, which contains the  
17 genomes of 3,552 Japanese individuals (3.5KJPNv2) [6], which is about three times greater than that  
18 used for the previous versions (JPAv1 and JPAv2). Of note, while the previous two versions of the

1 Japonica Array used mutual information for tag SNP selection [19], in JPA NEO we decided to change  
2 the method for selecting tag SNPs to one based on the standard protocol using pairwise  $r^2$  [9] (Table  
3 1). This has the advantage of allowing us to harmonize our data with those of other studies. We believe  
4 that it is of great importance to perform meta-analyses with other large-scale GWAS utilizing the same  
5 concept. A comparison of the design of JPA NEO with those of JPAv1 and JPAv2 is summarized in  
6 Table 1.

7 To optimize the selection of tag SNPs, we first selected tag SNPs from chromosome 10 of the  
8 3.5KJPNv2 reference panel by using greedy pairwise algorithm [9] with different combinations of  
9 thresholds of MAF; *i.e.*,  $\geq 0.005$ ,  $\geq 0.01$ , or  $\geq 0.05$  and pairwise  $r^2$  of LD measures;  $r^2 \geq 0.5$  or  $\geq 0.8$ .  
10 Two metrics were used to evaluate tag SNP performance: 1) genomic coverage, which is the proportion  
11 of untyped sites with at least one tag SNP with  $r^2$  greater than a given threshold; and 2) the number of  
12 variants obtained by genotype imputation above the threshold of a given INFO score, which is an  
13 index of imputation accuracy. When tag SNPs were selected by pairwise  $r^2 \geq 0.8$  and  $MAF \geq 0.01$ , the  
14 genomic coverage with  $r^2 \geq 0.8$  and the number of imputed variants from the 2KJPN reference panel  
15 (2,049 Japanese genomes) with  $INFO > 0.9$  were better or comparable to those of JPAv2 and Infinium  
16 Omni2.5-8 (Fig. 1). Based on these results, we decided to select tag SNPs with pairwise  $r^2$  of LD  
17 measures  $\geq 0.8$  and  $MAF \geq 0.01$  from the target set of autosomes and the X chromosome. For the design  
18 of JPA NEO, a substantial number, more than 1,000 of sex-chromosome SNPs on two



1 pseudoautosomal regions were newly selected, whereas only about 10 SNPs on these regions were  
2 available in JPAv1 and JPAv2.

3 We also selected Y chromosomal markers for the Y haplogroup classification of the  
4 International Society of Genetic Genealogy [20] and from those in JPAv1 and JPAv2, which were  
5 selected using pre-existing Axiom arrays for Asian populations. Mitochondrial markers were extracted  
6 mainly from 3.5KJPNv2 by removing those with MAF <0.5% as well as those with multiple alleles.  
7 Most markers corresponding to the HLA and KIR regions were taken over from those adopted for  
8 JPAv1 and JPAv2.

9

#### 10 *Selection of disease-related SNPs based on published evidence*

11 For the selection of disease-related markers, we picked approximately 9,000 SNPs present in  
12 the Japanese population, mainly from among published lists of disease genes and GWAS-identified  
13 risk variants. The former includes known and candidate functional variants on gene lists from the  
14 American College of Medical Genetics and Genomics [21] and 1,866 pharmacogenomics markers in  
15 38 genes, 18 of which were obtained from drug guidelines published by the Clinical Pharmacogenetics  
16 Implementation Consortium as of April 2020 [22]. The latter includes published risk variants for  
17 various complex diseases identified by GWAS of the Japanese population and a meta-analysis of East  
18 Asian populations. Representative examples are shown in a supplementary table [see Additional file

1 1], which includes 99 markers (96 genes) of type 2 diabetes [23], 100 markers (94 genes) of lipid  
2 metabolism, 45 markers (35 genes) of obesity, as well as 12 markers (7 genes) and 33 markers (24  
3 genes) of late-onset Alzheimer's disease identified by GWAS of the Japanese population and meta-  
4 analyses of European populations, respectively.

5 Moreover, approximately 13,000 and 12,000 markers were selected from the NHGRI GWAS  
6 catalog [24] and UK Biobank Array [14], respectively. We used reference panel 3.5KJPNv2 to extract  
7 the markers present in the Japanese population. The novel Axiom SNP Array specific to the Japanese  
8 population was developed as JPA NEO.

9

#### 10 *Japonica Array NEO has genome-wide coverage and contains disease risk SNPs*

11 The developed JPA NEO contains a total of 666,883 SNPs; the number of markers in each  
12 category is shown in Table 2 in comparison with JPAv1/JPAv2. In JPAv1/JPAv2, tag SNPs from  
13 autosomes and the X chromosome account for approximately 98% (>650,000 SNPs). In contrast,  
14 nearly 8,500 SNPs from the Y chromosome (779 markers), mitochondria (409 markers), and HLA and  
15 KIR regions (6,757 and 532 markers, respectively) were also included to realize genome-wide  
16 coverage and genotyping of specific functional variants.

17 Although there is some overlap with the above SNPs, a total of 28,298 disease-related SNPs in  
18 12 disease categories and pharmacogenomics are included as well (Table 3). These SNPs include risk

1 alleles for complex diseases, including dementia, depression, and autism spectrum disorder among  
2 psycho-neurologic diseases (5,556 markers), type 2 diabetes and hyperlipidemia among metabolic  
3 diseases (2,948 markers), and asthma and atopic dermatitis among immunological diseases (6,426  
4 markers). In addition, variants related to physical traits (height, blood protein levels, etc.), expression  
5 quantitative trait locus, and so on are categorized as ‘others.’

6 Of note, 3,472 markers (0.52%) in JPA NEO were MAF < 1% as confirmed by 3.5KJPNv2 [see  
7 the supplementary table in Additional file 2]. This is due to the adoption of some disease-related  
8 markers regardless of their MAF in 3.5KJPNv2. We have compiled the full list of disease-related  
9 markers with keywords and disease categories as a supplementary table [see Additional file 3], which  
10 can be downloaded from the jMorp website [25].

11

## 12 *High imputation performance of Japonica Array NEO*

13 We modified the tag SNPs for JPA NEO from the previous versions with the aim of improving  
14 the imputation coverage of the microarray. To verify this point, we analyzed the performance of JPA  
15 NEO in comparison with that of JPAv2. To this end, the same 286 samples, which were not included  
16 in the 3.5KJPNv2 reference panel, were genotyped using both JPA NEO and JPAv2. We found that the  
17 median call rates of JPAv2 and JPA NEO for all markers per sample were more than 99.6% and 99.8%,  
18 respectively [see the supplementary table in Additional file 4], indicating that the call rate of JPA NEO

1 is slightly better than that of the JPAv2.

2 More than 99% of markers were polymorphic in both JPAv2 and JPA NEO, as we intended  
3 (Table 4). Some microarrays are designed to cover a wide range of ethnicities, which is in contrast to  
4 the aim and scope of our Japanese-specific arrays. We hypothesized that the former type of microarrays  
5 may have lower performance compared with ethnic-specific ones. To address this point, we compared  
6 the performance of JPAv2 and the Infinium Asian Screening Array (ASA), which covers a wide range  
7 of Asian populations, including Japan, by using the genomes of 191 Japanese in the TMM cohorts. We  
8 found that more than 17 percent of markers were monomorphic in the ASA array, while >99% worked  
9 as polymorphic markers in JPAv2 (Table 4) with a median call rate of >99% for both arrays [see the  
10 supplementary table in Additional File 4]. This observation supports our contention that ethnic-specific  
11 microarrays are critical for analyzing each ethnic population.

12 When we closely inspected the MAF distributions of JPA NEO in comparison with those of  
13 JPAv2, we noticed that JPAv2 showed low numbers of MAF markers (15%–25%) compared with JPA  
14 NEO (Fig. 2). We envisage that this may be due to the method for selecting tag SNPs. However, our  
15 new selection method has significantly improved the marker distribution in this region.

16 We performed genotype imputation of autosomes by using the haplotype reference panel of  
17 3.5KJPNv2 and evaluated the imputation accuracy according to two metrics, imputation quality  $r^2$  and  
18 INFO score. The mean  $r^2$  and INFO score were more than 0.9 and 0.8, respectively, in MAF bin

1 >2.5%–5% of two arrays (Fig. 3), indicating reliable imputation accuracy for both JPAv2 and JPA  
2 NEO. However, importantly, we also noticed that there was a significant decrease in mean  $r^2$  in the  
3 region over MAF 20% in JPAv2. Whereas the precise reason for this decrease remains to be clarified,  
4 the decrease has been abrogated in JPA NEO.

5 As shown in Table 5, slightly but clearly more imputed markers with INFO >0.8 were obtained  
6 from genotyping data by JPA NEO than JPAv2, especially those with MAF <1% (1.08-fold). We found  
7 that a total of >12 million markers were imputed by the small-scale analyses of the two arrays. These  
8 results indicate that while both JPA NEO and JPAv2 provide sufficient power for genotyping the  
9 Japanese population and following genotype imputation, JPA NEO shows better imputation  
10 performance without any bias throughout MAF bins. Thus, we conclude that JPA NEO is the most  
11 reliable imputation array ever developed for the Japanese population.

12

### 13 *Large-scale genotyping by Japonica Arrays in the TMM project*

14 To establish a solid research infrastructure for genomic medicine in Japan, the TMM project  
15 aimed to generate as much genotype data as possible from its 150,000 participants. To this end, we  
16 have been genotyping TMM cohort participants using the Japonica Array since 2014. To complete  
17 such as large-scale genotyping efficiently, we established an elaborate three-group system from sample  
18 selection to genotyping, which connects to the data qualification.

1           We prepared our own special workflow for the ToMMo analysis, which ensures efficient and  
2 reliable sample processing and supports high-throughput measurement (Fig. 4). The first step is  
3 preparing the target sample lists containing the thousands of participants corresponding to a specific  
4 purpose, such as the TMM CommCohort participants with respiratory function data. The selection of  
5 participants and availability of DNA samples or biospecimens are supported by a laboratory  
6 information management system (LIMS) at the TMM biobank [26]. This step is conducted by Center  
7 for Genome Platform Projects. The second step is extracting and dispensing the DNA into 96-well  
8 plates. To divide samples into individual plates in a well-ordered and formulated manner, the  
9 correspondence between sample identifier (ID) and well position is manifested by creating the plate  
10 map before dispensing the DNA samples. This step is conducted by Group of Biobank. The final step  
11 is transporting the DNA plates and plate maps to the genotyping facility attached to the TMM Biobank,  
12 which is operated using LIMS by Group of Microarray-based Genotyping Analysis. For security  
13 control, different sample IDs were used for sample collection, storage, and analysis [27].

14           Capitalizing on this workflow, in May 2020, we obtained JPA data of approximately 130,000  
15 participants who met the criteria for quality control (QC) analysis using control markers. The dataset  
16 comprises approximately 2,000 JPAv1, 101,000 JPAv2, and 27,000 JPA NEO data (Table 6). We have  
17 already analyzed more than 63,000 samples from the TMM CommCohort by using JPAv2, whereas  
18 the TMM BirThree Cohort samples were analyzed by either JPAv2 or JPA NEO. Considering further

1 association analyses, we are in the process of designing a rigid protocol that would allow each family  
2 unit to be analyzed by the same JPA.

3 We have been using DNA samples obtained primarily from peripheral or cord blood. When  
4 samples from these sources were not available, mostly those from the children of TMM BirThree  
5 Cohort participants, DNA from saliva samples was used and analyzed separately with the one from  
6 blood. In our operation, the QC pass rate has been more than 99% for blood samples using both JPAv2  
7 and JPA NEO. In contrast, that of saliva samples is approximately 90% using JPAv2, likely due to the  
8 presence of lower-quality samples. We believe that with this accomplishment, JPA NEO now has  
9 enough control data of the resident population to be an important and useful array for the entire  
10 Japanese population.

11

12

### 13 **Discussion**

14 The TMM project is one of the first large-scale prospective genome cohort studies in Japan and  
15 aims to realize precision medicine and personalized healthcare. To construct genome research  
16 infrastructure, we had to consider a cost-effective and high-throughput strategy for the acquisition of  
17 genomic data of more than 150,000 participants. Based on previous studies on genomic variants in  
18 diverse populations [28], we recognized that commercial arrays for global or even Asian populations

1 were not sufficient for our purpose. Therefore, we decided to develop a custom ethnic-specific SNP  
2 array, the Japonica Array, to maximize the acquisition of polymorphic markers in the Japanese  
3 population and provide genomic coverage with reliable genotype imputation accuracy while reducing  
4 cost.

5 In the TMM project, the whole-genome reference panel was expanded from 1KJPN to 2KJPN  
6 and 3.5KJPN. The latest version, 3.5KJPNv2, was constructed not only with an increased number of  
7 single nucleotide variants but also added those from the X chromosome and mitochondria [6]. JPA  
8 NEO was designed by re-selecting the tag SNPs of autosomes and the X chromosome from this panel.  
9 The haplotype reference panel for genotype imputation was also updated from 2KJPN to 3.5KJPNv2.  
10 This update to the imputation panel yielded an increase of more than 5 million imputed variants in the  
11 preliminary analysis of 335 samples using JPAv2 data compared with those obtained by genotype  
12 imputation with 2KJPN in the same sample analysis (data not shown). Thus, 3.5KJPNv2 is more  
13 effective than previous reference panels in providing genome-wide coverage in terms of both tag SNP  
14 selection and genotype imputation.

15 The genotype imputation performance of JPA NEO was evaluated in comparison with that of  
16 JPAv2 by performing a small-scale analysis. In the genotyping data obtained by both arrays,  
17 monomorphic markers were scarcely observed and the large number of variants were imputed with a  
18 high imputation quality  $r^2$  and INFO score. Of note, JPA NEO showed better statistics compared with



1 JPAv2 but without any bias, suggesting that JPA NEO is the best-ever SNP array developed for the  
2 Japanese population. The compatibility of markers in JPAv2 and JPA NEO is approximately 40% (data  
3 not shown). Therefore, it seems important to develop a method for utilizing the genotyping data  
4 obtained by different JPA array platforms, which we plan to provide as a user guideline when the full  
5 data of all 150,000 TMM participants is released.

6 JPA NEO incorporates nearly 30,000 disease-related variants previously reported in the  
7 literature and stored in databases, to allow for the evaluation of known functional risk alleles in the  
8 Japanese population. Because some SNPs with MAF <1% were included, their SNP cluster plots and  
9 the concordance with genotypes obtained by WGS analysis must be carefully assessed. However,  
10 qualified disease risk variants can be used for association studies along with phenotype data.

11 The Japonica Arrays have been used to perform large-scale genotyping of TMM samples.  
12 Whereas we have not experienced any issues with plate QC assessments conducted so far, we are  
13 planning to carefully implement batch-based as well as statistical genetic QC analyses to assess  
14 whether a plate effect is caused by sample selection bias. Indeed, in the UK Biobank, a sample picking  
15 algorithm has been used for genotyping experiments to prevent clustering of participants in the same  
16 plate by time or date of collection, collection center, geography, or participant phenotypes [29]. In  
17 contrast, we did not intentionally randomize sample picking; we selected samples according to the aim  
18 of our analysis. For example, TMM CommCohort samples with respiratory function data for GWAS

1 were selected and analyzed using the same plates. Therefore, each plate should include samples  
2 collected from the same periods, regions, and families.

3       Among the approximately 130,000 genotyping data of TMM participants that we have  
4 processed so far, samples satisfying the criteria of sample dish QC (DQC) and QC call rate are quite  
5 high, especially when using blood samples (>99.8%). However, the pass rate of saliva samples was  
6 slightly worse (>89.8%) than that of blood samples in JPAv2. The use of saliva has been reported yield  
7 a low rate in other large-scale genotyping projects, for instance, 93.8% in the Genetic Epidemiology  
8 Research on Adult Health and Aging cohort [30]. This may be due to the lower quality of saliva-  
9 derived samples, which is sometimes observed by electrophoresis as DNA degradation; this is likely  
10 due to problems during sample collection by participants, such as when they mix the sample with  
11 Oragene preservative solution. We are sharing the direct and imputed genotyping data with the  
12 research community upon completion of the QC analyses and genotype imputation. More than 54,000  
13 Japonica Array data have already been released as of June 2020, with associated data such as  
14 biochemical examinations and questionnaires. The full genotype data of the TMM project is expected  
15 to be released soon.

16       Data obtained by the genotype imputation array have been successfully utilized for GWAS.  
17 Summary statistics of large-scale GWAS are precious for the development of genetic risk scores, such  
18 as the polygenic risk score (PRS) [31]. PRSs will be used to identify groups of individuals for

1 therapeutic intervention, initiation and interpretation of disease screens, and life planning [32]. So far,  
2 the number and scale of GWAS in the European population greatly exceed those in non-European  
3 populations [33]. However, the application of PRSs based on European cohorts to other populations  
4 is limited due to biases originating from the genomic diversity among populations, for instance, the  
5 difference in LD structure around causal variants. Further investigation is required to evaluate the  
6 clinical utility of PRSs used together with conventional clinical risk scores [34, 35].

7 We believe that our future efforts should be focused on acquiring genotype data from all  
8 participants of the TMM cohorts as well as implementing a GWAS to develop and evaluate genetic  
9 risk scores, including PRSs, optimized for the Japanese population. Genomic data obtained by the  
10 TMM project will serve as an excellent control for the GWAS executed using other biobanks/cohorts  
11 in Japan, and it will also be exploited for GWAS of associated phenotypes and omics data from the  
12 TMM project. We also believe that the Japonica Array should continue to be updated. For the next  
13 version, we are planning to design a medical checkup array with a minimal set of tag

14 SNPs that nevertheless contains abundant risk SNPs. These efforts will also contribute to further  
15 identifying genetic determinants of diseases in those of East Asian ancestry [28].

16

## 17 **Conclusions**

18 We designed a new version of the Japonica Array, JPA NEO, to improve both genome-wide

1 coverage and genotyping of disease risk variants. Disease risk variants were selected from the  
2 literature and filtered by our reference panel to extract those expected to be present in the Japanese  
3 population. Experimental verification using the developed JPA NEO showed greater imputation  
4 performance without any bias through a wide range of MAF and with increased imputed variants  
5 compared with the previous version. Large-scale genotyping of TMM samples using JPA NEO is now  
6 underway. JPA NEO will provide highly accurate, efficient, and cost-effective genotyping for the  
7 Japanese population. Combining the Japonica Array data of TMM participants with those of other  
8 Japanese biobanks/cohorts will be helpful for better understanding the genetic risks of complex  
9 diseases, leading to its application for disease risk prediction and prevention and consequently  
10 personalized healthcare.

11

12

### 13 **Methods**

#### 14 *Tag SNP selection for Japonica Array NEO*

15 A target set was constructed using founders in the repository of our new genome reference panel  
16 consisting of genomes from 3,820 Japanese participants [6]. For X chromosome, only females of  
17 above panel (2,066 Japanese individuals) were used. Tag SNPs were selected by the standard greedy  
18 pairwise algorithm based on the pairwise  $r^2$  of LD statistics [9, 12, 13]. Briefly, starting with a set of

1 target sites with a MAF higher than a specific threshold, one site with the maximum number of others  
2 exceeding the  $r^2$  threshold was selected. Then, this maximally informative site and all other associated  
3 sites were grouped as a bin of tag SNPs and removed from the target set. These steps were iterated  
4 until the total number of tag SNPs matched that of JPAv2. When multiple tag SNPs were selected in  
5 the same step, we prioritized them according to the following three criteria: 1) the maximum score of  
6 annotation by ANNOVAR [36] (exonic or splicing = 6, ncRNA = 5, 5'-UTR or 3'-UTR = 4, intronic =  
7 3, upstream or downstream = 2, intergenic = 1, and no annotation = 0); 2) not A-T or G-C of alternative-  
8 reference alleles, and 3) yielding the maximum variance of base-pair positions.

9

#### 10 *Selection of disease-related SNPs for Japonica Array NEO*

11 Disease-related markers were selected primarily from published lists of disease-related genes  
12 and GWAS results of Japanese populations, with expert advice. In addition, markers in the NHGRI  
13 GWAS catalog [24] and the UK Biobank Array [14] were also selected. From the latter, we extracted  
14 markers present in the Japanese population by referring to the 3.5KJPNv2 panel.

15

#### 16 *Development of Japonica Array NEO*

17 The list of tag SNPs and disease-related markers were combined with those of Y chromosome  
18 and mitochondrial markers. Based on the combined list, the array was produced using the Axiom

1 myDesign service (Thermo Fisher Scientific, Inc.). Multiple probes were designed for markers that  
2 were not included in the Axiom™ validated probe sets. Then, control markers were added, and the  
3 total number of markers was adjusted to the maximum number for the Axiom 96-array layout. The full  
4 marker list and detailed list of disease-related SNPs are available at the jMorp website  
5 (<https://jmorp.megabank.tohoku.ac.jp/202001/downloads#jpa>).

6

#### 7 *DNA samples*

8 Isolation and QC of genomic DNA from blood and saliva samples in the TMM biobank were  
9 performed as described previously [26]. Genomic DNA samples isolated from the blood of TMM  
10 participants, but not those included in the reference panel, were used to evaluate JPA NEO.

11

#### 12 *Genotyping with Japonica Arrays*

13 A genotype assay was performed according to the manufacturer's protocol (i.e., Axiom™ 2.0  
14 Genotyping Assay User Manual for 8-plate workflow). Briefly, target DNA was enzymatically  
15 amplified and fragmented, and after confirmations of concentration and fragment length by  
16 NanoDrop (Thermo Fisher Scientific) and TapeStation System (Agilent Technologies), hybridization,  
17 ligation, and scanning were processed by a semi-automated machine, GeneTitan™ Multi-Channel  
18 Instrument (Thermo Fisher Scientific). These processes were conducted using liquid-dispensable

1 robots (Nimbus™, Hamilton; Biomek FX<sup>P</sup>, Beckman Coulter) and managed by LIMS (LabVantage  
2 Solutions). For the QC, the DQC, sample QC call rate, and plate pass rate were analyzed using control  
3 markers for the Axiom platform (around 19,000) according to the Axiom™ Genotyping Solution Data  
4 Analysis Guide using Axiom™ Power Tools (APT, version 1.16.1). Genotyping data satisfying the  
5 criteria were used for the following QC analyses.

6

#### 7 *Quality control analysis and genotype imputation*

8 Genotyping data were further analyzed for SNP QC, sample QC, and plate QC using all markers  
9 per plate, in accordance with the abovementioned analysis guide. After filtering out variant sites with  
10 low call rates, low MAF, or showing substantial deviation from Hardy-Weinberg equilibrium,  
11 SHAPEIT2 [37] and IMPUTE2 [38] were used to conduct pre-phasing and genotype imputation,  
12 respectively. The imputation accuracy was evaluated using the squared correlation,  $r^2$ , with leave-one-  
13 out SNP masking methods [12, 13, 39]. Briefly, genotype imputation was performed by masking an  
14 input SNP and the imputed SNP was compared with the masked one to obtain  $r^2$ , after which the  
15 average  $r^2$  in each MAF bin was calculated. Another metric, the information measure (INFO score)  
16 given by IMPUTE2, was used to analyze the imputation quality for each marker, where the value 0-1  
17 indicated the uncertainty about the imputed genotype [11].

18

1 **List of Abbreviations**

2 ASA, Asian Screening Array; DQC, sample dish quality control; GWAS, genome-wide association  
3 study; HLA, human leukocyte antigen; JPA, Japonica Array; KIR, killer cell immunoglobulin-like  
4 receptor; LD, linkage disequilibrium; LIMS, laboratory information management system; MAF, minor  
5 allele frequency; PRS, polygenic risk score; QC, quality control; SNP, single nucleotide  
6 polymorphism; TMM, Tohoku Medical Megabank; ToMMo, Tohoku Medical Megabank  
7 Organization; WGS, whole-genome sequencing;

8

9 **Declarations**

10 *Ethics approval and consent to participate*

11 The study was approved by the Research Ethics Committee of Tohoku Medical Megabank  
12 Organization, Tohoku University.

13

14 *Consent for publication*

15 Not applicable.

16

17 *Availability of data and materials*

18 The full and disease-related marker lists of JPA NEO are available for download from the jMorp



1 website at <https://jmorp.megabank.tohoku.ac.jp/202001/downloads#jpa>. The datasets used and/or  
2 analyzed during the current study are available from the corresponding author on reasonable request.

3

#### 4 *Competing interests*

5 The authors declare that they have no competing interests.

6

#### 7 *Funding*

8 This work was supported by following programs by the Japan Agency for Medical Research and  
9 Development (AMED) and the Ministry of Education, Culture, Sports, Science and Technology  
10 (MEXT); the Tohoku Medical Megabank Project (JP19km0105001 and JP19km0105002), the  
11 Advanced Genome Research and Bioinformatics Study to Facilitate Medical Innovation (GRIFIN;  
12 JP19km0405203) and the Facilitation of R&D Platform for the AMED Genome Medicine Support  
13 (JP19km0405001) of the Platform Program for Promotion of Genome Medicine (P3GM). This work  
14 was partially supported by the Center of Innovation (COI) Program (JPMJCE1303) from the MEXT  
15 and the Japan Science and Technology Agency (JST). The funding bodies played no role in the design  
16 of the study and collection, analysis, and interpretation of data and in writing the manuscript.

17

#### 18 *Authors' Contributions*

1 K Ku, CG, SM, AU, ST, INM, AO, AN, and YA performed the computational analyses. MS-Y, K Ku,  
2 MK, SI, AO, and HKu prepared the samples and conducted the genotyping experiments. MS-Y, MY,  
3 and K Ki wrote the manuscript with assistance from the other authors. MS-Y, ID, JY, HKa, NM, SK,  
4 NF, GT, MY, and K Ki conceived and supervised the project. All authors read and approved the final  
5 manuscript.

6

### 7 *Acknowledgements*

8 We would like to thank all participants of the TMM Study. We would also like to acknowledge  
9 everyone who assisted with the study, especially Sachiyo Sugimoto, Nanako Sugawara, and Satoshi  
10 Souma for technical assistance, and Hiroaki Hashizume for fruitful discussion. The full list of ToMMo  
11 members is available at <https://www.megabank.tohoku.ac.jp/english/a200601/>. We would also like to  
12 thank the Iwate Medical University Iwate Tohoku Medical Megabank Organization for collaboration.

13

14

## 1   **References**

- 2    1.     Kuriyama S, Yaegashi N, Nagami F, Arai T, Kawaguchi Y, Osumi N, Sakaida M, Suzuki Y,  
3     Nakayama K, Hashizume H et al: The Tohoku Medical Megabank Project: Design and  
4     Mission. *J Epidemiol* 2016, 26(9):493-511.
- 5    2.     Hozawa A, Tanno K, Nakaya N, Nakamura T, Tsuchiya N, Hirata T, Narita A, Kogure M,  
6     Nochioka K, Sasaki R et al: Study profile of The Tohoku Medical Megabank Community-  
7     Based Cohort Study. *J Epidemiol* 2020. Online ahead of print.
- 8    3.     Kuriyama S, Metoki H, Kikuya M, Obara T, Ishikuro M, Yamanaka C, Nagai M, Matsubara  
9     H, Kobayashi T, Sugawara J et al: Cohort Profile: Tohoku Medical Megabank Project Birth  
10    and Three-Generation Cohort Study (TMM BirThree Cohort Study): rationale, progress and  
11    perspective. *Int J Epidemiol* 2020, 49(1):18-19m.
- 12   4.     Fuse N, Sakurai-Yageta M, Katsuoka F, Danjoh I, Shimizu R, Tamiya G, Nagami F, Kawame  
13    H, Higuchi S, Kinoshita K et al: Establishment of Integrated Biobank for Precision Medicine  
14    and Personalized Healthcare: The Tohoku Medical Megabank Project. *JMA Journal* 2019,  
15    2(2):113-122.
- 16   5.     Nagasaki M, Yasuda J, Katsuoka F, Nariai N, Kojima K, Kawai Y, Yamaguchi-Kabata Y,  
17    Yokozawa J, Danjoh I, Saito S et al: Rare variant discovery by deep whole-genome  
18    sequencing of 1,070 Japanese individuals. *Nat Commun* 2015, 6:8018.

- 1 6. Tadaka S, Katsuoka F, Ueki M, Kojima K, Makino S, Saito S, Otsuki A, Gocho C, Sakurai-  
2 Yageta M, Danjoh I et al: 3.5KJPNv2: an allele frequency panel of 3552 Japanese individuals  
3 including the X chromosome. *Hum Genome Var* 2019, 6:28.
- 4 7. International HapMap Consortium: A haplotype map of the human genome. *Nature* 2005,  
5 437(7063):1299-1320.
- 6 8. 1000 Genomes Project Consortium, Abecasis GR, Altshuler D, Auton A, Brooks LD, Durbin  
7 RM, Gibbs RA, Hurles ME, McVean GA: A map of human genome variation from population-  
8 scale sequencing. *Nature* 2010, 467(7319):1061-1073.
- 9 9. Carlson CS, Eberle MA, Rieder MJ, Yi Q, Kruglyak L, Nickerson DA: Selecting a maximally  
10 informative set of single-nucleotide polymorphisms for association analyses using linkage  
11 disequilibrium. *Am J Hum Genet* 2004, 74(1):106-120.
- 12 10. Marchini J, Howie B, Myers S, McVean G, Donnelly P: A new multipoint method for genome-  
13 wide association studies by imputation of genotypes. *Nat Genet* 2007, 39(7):906-913.
- 14 11. Marchini J, Howie B: Genotype imputation for genome-wide association studies. *Nat Rev*  
15 *Genet* 2010, 11(7):499-511.
- 16 12. Hoffmann TJ, Kvale MN, Hesselson SE, Zhan Y, Aquino C, Cao Y, Cawley S, Chung E,  
17 Connell S, Eshragh J et al: Next generation genome-wide association tool: design and  
18 coverage of a high-throughput European-optimized SNP array. *Genomics* 2011, 98(2):79-89.

- 1 13. Hoffmann TJ, Zhan Y, Kvale MN, Hesselson SE, Gollub J, Iribarren C, Lu Y, Mei G, Purdy  
2 MM, Quesenberry C et al: Design and coverage of high throughput genotyping arrays  
3 optimized for individuals of East Asian, African American, and Latino race/ethnicity using  
4 imputation and a novel hybrid SNP selection algorithm. *Genomics* 2011, 98(6):422-430.
- 5 14. Bycroft C, Freeman C, Petkova D, Band G, Elliott LT, Sharp K, Motyer A, Vukcevic D,  
6 Delaneau O, O'Connell J et al: The UK Biobank resource with deep phenotyping and genomic  
7 data. *Nature* 2018, 562(7726):203-209.
- 8 15. Ehli EA, Abdellaoui A, Fedko IO, Grieser C, Nohzadeh-Malakshah S, Willemsen G, de Geus  
9 EJ, Boomsma DI, Davies GE, Hottenga JJ: A method to customize population-specific arrays  
10 for genome-wide association testing. *Eur J Hum Genet* 2017, 25(2):267-270.
- 11 16. Chen CH, Yang JH, Chiang CWK, Hsiung CN, Wu PE, Chang LC, Chu HW, Chang J, Song  
12 IW, Yang SL et al: Population structure of Han Chinese in the modern Taiwanese population  
13 based on 10,000 participants in the Taiwan Biobank project. *Hum Mol Genet* 2016,  
14 25(24):5321-5331.
- 15 17. Moon S, Kim YJ, Han S, Hwang MY, Shin DM, Park MY, Lu Y, Yoon K, Jang HM, Kim YK  
16 et al: The Korea Biobank Array: Design and Identification of Coding Variants Associated with  
17 Blood Biochemical Traits. *Sci Rep* 2019, 9(1):1382.

- 1 18. Dai J, Lv J, Zhu M, Wang Y, Qin N, Ma H, He YQ, Zhang R, Tan W, Fan J et al: Identification  
2 of risk loci and a polygenic risk score for lung cancer: a large-scale prospective cohort study  
3 in Chinese populations. *Lancet Respir Med* 2019, 7(10):881-891.
- 4 19. Kawai Y, Mimori T, Kojima K, Nariai N, Danjoh I, Saito R, Yasuda J, Yamamoto M, Nagasaki  
5 M: Japonica array: improved genotype imputation by designing a population-specific SNP  
6 array with 1070 Japanese individuals. *J Hum Genet* 2015, 60(10):581-587.
- 7 20. Jobling MA, Tyler-Smith C: The human Y chromosome: an evolutionary marker comes of  
8 age. *Nat Rev Genet* 2003, 4(8):598-612.
- 9 21. Kalia SS, Adelman K, Bale SJ, Chung WK, Eng C, Evans JP, Herman GE, Hufnagel SB, Klein  
10 TE, Korf BR et al: Recommendations for reporting of secondary findings in clinical exome  
11 and genome sequencing, 2016 update (ACMG SF v2.0): a policy statement of the American  
12 College of Medical Genetics and Genomics. *Genet Med* 2017, 19(2):249-255.
- 13 22. Caudle KE, Dunnenberger HM, Freimuth RR, Peterson JF, Burlison JD, Whirl-Carrillo M,  
14 Scott SA, Rehm HL, Williams MS, Klein TE et al: Standardizing terms for clinical  
15 pharmacogenetic test results: consensus terms from the Clinical Pharmacogenetics  
16 Implementation Consortium (CPIC). *Genet Med* 2017, 19(2):215-223.

- 1 23. Imamura M, Takahashi A, Yamauchi T, Hara K, Yasuda K, Grarup N, Zhao W, Wang X,  
2 Huerta-Chagoya A, Hu C et al: Genome-wide association studies in the Japanese population  
3 identify seven novel loci for type 2 diabetes. *Nat Commun* 2016, 7:10531.
- 4 24. MacArthur J, Bowler E, Cerezo M, Gil L, Hall P, Hastings E, Junkins H, McMahon A, Milano  
5 A, Morales J et al: The new NHGRI-EBI Catalog of published genome-wide association  
6 studies (GWAS Catalog). *Nucleic Acids Res* 2017, 45(D1):D896-D901.
- 7 25. Tadaka S, Saigusa D, Motoike IN, Inoue J, Aoki Y, Shirota M, Koshiha S, Yamamoto M,  
8 Kinoshita K: jMorp: Japanese Multi Omics Reference Panel. *Nucleic Acids Res* 2018,  
9 46(D1):D551-D557.
- 10 26. Minegishi N, Nishijima I, Nobukuni T, Kudo H, Ishida N, Terakawa T, Kumada K, Yamashita  
11 R, Katsuoka F, Ogishima S et al: Biobank Establishment and Sample Management in the  
12 Tohoku Medical Megabank Project. *Tohoku J Exp Med* 2019, 248(1):45-55.
- 13 27. Takai-Igarashi T, Kinoshita K, Nagasaki M, Ogishima S, Nakamura N, Nagase S, Nagaie S,  
14 Saito T, Nagami F, Minegishi N et al: Security controls in an integrated Biobank to protect  
15 privacy in data sharing: rationale and study design. *BMC Med Inform Decis Mak* 2017,  
16 17(1):100.

- 1 28. Genomes Project C, Auton A, Brooks LD, Durbin RM, Garrison EP, Kang HM, Korbel JO,  
2 Marchini JL, McCarthy S, McVean GA et al: A global reference for human genetic variation.  
3 *Nature* 2015, 526(7571):68-74.
- 4 29. Welsh S, Peakman T, Sheard S, Almond R: Comparison of DNA quantification methodology  
5 used in the DNA extraction protocol for the UK Biobank cohort. *BMC Genomics* 2017,  
6 18(1):26.
- 7 30. Kvale MN, Hesselson S, Hoffmann TJ, Cao Y, Chan D, Connell S, Croen LA, Dispensa BP,  
8 Eshragh J, Finn A et al: Genotyping Informatics and Quality Control for 100,000 Subjects in  
9 the Genetic Epidemiology Research on Adult Health and Aging (GERA) Cohort. *Genetics*  
10 2015, 200(4):1051-1060.
- 11 31. Khera AV, Chaffin M, Aragam KG, Haas ME, Roselli C, Choi SH, Natarajan P, Lander ES,  
12 Lubitz SA, Ellinor PT et al: Genome-wide polygenic scores for common diseases identify  
13 individuals with risk equivalent to monogenic mutations. *Nat Genet* 2018, 50(9):1219-1224.
- 14 32. Torkamani A, Wineinger NE, Topol EJ: The personal and clinical utility of polygenic risk  
15 scores. *Nat Rev Genet* 2018, 19(9):581-590.
- 16 33. Gurdasani D, Barroso I, Zeggini E, Sandhu MS: Genomics of disease risk in globally diverse  
17 populations. *Nat Rev Genet* 2019, 20(9):520-535.



- 1 34. Mosley JD, Gupta DK, Tan J, Yao J, Wells QS, Shaffer CM, Kundu S, Robinson-Cohen C,  
2 Psaty BM, Rich SS et al: Predictive Accuracy of a Polygenic Risk Score Compared With a  
3 Clinical Risk Score for Incident Coronary Heart Disease. *JAMA* 2020, 323(7):627-635.
- 4 35. Elliott J, Bodinier B, Bond TA, Chadeau-Hyam M, Evangelou E, Moons KGM, Dehghan A,  
5 Muller DC, Elliott P, Tzoulaki I: Predictive Accuracy of a Polygenic Risk Score-Enhanced  
6 Prediction Model vs a Clinical Risk Score for Coronary Artery Disease. *JAMA* 2020,  
7 323(7):636-645.
- 8 36. Wang K, Li M, Hakonarson H: ANNOVAR: functional annotation of genetic variants from  
9 high-throughput sequencing data. *Nucleic Acids Res* 2010, 38(16):e164.
- 10 37. Delaneau O, Marchini J, Zagury JF: A linear complexity phasing method for thousands of  
11 genomes. *Nat Methods* 2011, 9(2):179-181.
- 12 38. Howie BN, Donnelly P, Marchini J: A flexible and accurate genotype imputation method for  
13 the next generation of genome-wide association studies. *PLoS Genet* 2009, 5(6):e1000529.
- 14 39. Wojcik GL, Fuchsberger C, Taliun D, Welch R, Martin AR, Shringarpure S, Carlson CS,  
15 Abecasis G, Kang HM, Boehnke M et al: Imputation-Aware Tag SNP Selection To Improve  
16 Power for Large-Scale, Multi-ethnic Association Studies. *G3 (Bethesda)* 2018, 8(10):3255-  
17 3267.
- 18

1 **Figure legends**

2 **Figure 1.** Evaluation of tag SNPs performance selected by different conditions.

3 Tag SNPs were selected by different thresholds of pairwise  $r^2$  (0.5 or 0.8) and MAF (0.005, 0.01, or  
4 0.05) from the target set of chromosome 10. The markers on JPAv2 or Infinium Omni-2.5-8 (Onmi  
5 2.5) in the same chromosome were used for the control. (A) Genomic coverage was analyzed with  $r^2$   
6 threshold of 0.2, 0.5, or 0.8. (B) The number of imputed variants by the 2KJPN haplotype reference  
7 panel with an INFO score threshold of 0.5 or 0.9.

8

9 **Figure 2.** MAF distributions from small-scale genotyping.

10 The MAF distributions of (A) JPA NEO and (B) JPAv2 were obtained by genotyping 286 individuals  
11 and analyzing 659,754 and 643,417 markers, respectively. The number of markers present in each  
12 MAF bin (0.01 interval) is shown.

13

14 **Figure 3.** Imputation accuracy of JPA NEO compared with that of JPAv2.

15 Imputation accuracy was measured by (A) the coefficient of determination,  $r^2$ , and (B) the INFO score.  
16 Genotyping was performed for 286 individuals using both arrays, and genotype imputation was  
17 performed using the 3.5KJPNv2 haplotype reference panel. The mean values in each MAF bin are  
18 shown.

1

2 **Figure 4.** Workflow for large-scale genotyping in the TMM project.

3 Based on the plate maps created from the target sample lists, the DNA plates were prepared and

4 transported to the genotyping facility.

5

6

1 **Supplementary information**

2 **Additional file 1: Table S1.xls** List of SNPs in JPA NEO related to (A) type 2 diabetes in Japanese,  
3 (B) lipid metabolism in Japanese and East Asians, (C) obesity in Japanese and East Asians, (D) late-  
4 onset Alzheimer's disease in Japanese, and (E) late-onset Alzheimer's disease in Europeans.

5

6 **Additional file 2: Table S2.xls** Classification of MAF of markers on JPA NEO by referring to  
7 3.5KJPNv2. Tri-allelic markers and the ones of insertions/deletions were removed before analysis.

8

9 **Additional file 3: Table S3.xls** The full list of disease-related SNPs with keywords and disease  
10 categories. The correspondences for disease IDs and categories are as follows: A, psycho-neurologic  
11 diseases; B, cardiovascular diseases; C, respiratory diseases; D, metabolic diseases; E, immunological  
12 diseases; F, ophthalmological diseases; G, mitochondrial diseases; H, urological diseases; I,  
13 gastrointestinal disease; J, gynecological diseases; K, cancer; L, inherited diseases; M,  
14 pharmacogenomics; o, others. The markers carried over from Japonica Array v2 are indicated as 'carry  
15 over v2'. Among them, the markers with no specific keywords are indicated as 'NS.'

16

17 **Additional file 4: Table S4.xls** Call rate per sample according to small-scale genotyping of Japanese  
18 individuals. Genotyping was performed using the same DNA sample set for each comparative analysis.

- 1 The markers within the recommended probe set list created during the QC analysis were used for JPA
- 2 NEO and JPAv2, while tri-allelic markers and those of missing and overlapping positions were
- 3 removed for ASA.
- 4
- 5

**Table 1** Overview of Japonica Array design

|                                                         | JPAv1 [19]<br>(released 2014 Dec. 01) | JPAv2<br>(released 2017 Oct. 27) | JPA NEO<br>(released 2019 Sep. 17)                                                                                                                              |
|---------------------------------------------------------|---------------------------------------|----------------------------------|-----------------------------------------------------------------------------------------------------------------------------------------------------------------|
| Tag SNPs                                                |                                       |                                  |                                                                                                                                                                 |
| Whole genome reference panel of the Japanese population | 1KJPN [5]<br>(n = 1,070)              | 1KJPN [5]<br>(n = 1,070)         | 3.5KJPNv2 [6]<br>(n = 3,552 <sup>a</sup> )                                                                                                                      |
| Method for selection                                    | Mutual information [19]               | Mutual information [19]          | $r^2$ of LD measures [9];<br>$r^2 \geq 0.8$                                                                                                                     |
| MAF threshold                                           | $\geq 0.5\%$                          | $\geq 0.5\%$                     | $\geq 1\%$                                                                                                                                                      |
| Disease-related SNPs                                    | NHGRI GWAS catalog [24]               | NHGRI GWAS catalog [24]          | Published GWAS data primarily of the Japanese population, published lists of disease genes, NHGRI GWAS catalog [24], and the UK Biobank Array [14] <sup>b</sup> |

<sup>a</sup>including samples outside from the Tohoku region

<sup>b</sup>markers present in the Japanese population extracted by 3.5KJPNv2

**Table 2** Number of markers for each category of JPAv1, JPAv2, and JPA NEO

| Category                                         | Number of markers <sup>a</sup> |         |                     |
|--------------------------------------------------|--------------------------------|---------|---------------------|
|                                                  | JPAv1                          | JPAv2   | JPA NEO             |
| Tag SNPs including 22 autosomes and X chromosome | 638,269                        | 632,186 | 654,246             |
| Y Chromosome                                     | 275                            | 606     | 779                 |
| Mitochondria                                     | 70                             | 104     | 409                 |
| HLA                                              | 3,906                          | 6,914   | 6,757               |
| KIR                                              | 412                            | 1,014   | 532                 |
| Disease-related markers                          |                                |         |                     |
| from the literature                              | -                              | -       | 9,366               |
| from databases                                   | 10,798                         | 11,171  | 22,451 <sup>b</sup> |
| Total                                            | 659,253                        | 659,328 | 666,883             |

<sup>a</sup>including markers present in multiple categories

<sup>b</sup>extracted markers present in Japanese population by 3.5KJPNv2

**Table 3** Summary of disease-related markers in Japonica Array NEO

| Disease category           | Number of markers <sup>a</sup> |
|----------------------------|--------------------------------|
| Psycho-neurologic diseases | 5,556                          |
| Cardiovascular diseases    | 1,108                          |
| Respiratory diseases       | 2,000                          |
| Metabolic diseases         | 2,948                          |
| Immunological diseases     | 6,426                          |
| Ophthalmological diseases  | 441                            |
| Mitochondrial diseases     | 61                             |
| Urological diseases        | 367                            |
| Gastrointestinal diseases  | 452                            |
| Gynecological diseases     | 270                            |
| Cancer                     | 986                            |
| Inherited diseases         | 943                            |
| Pharmacogenomics           | 1,866                          |
| other <sup>b</sup>         | 10,345                         |
| total <sup>c</sup>         | 28,298                         |

<sup>a</sup>Some markers are included in multiple categories

<sup>b</sup>physical traits, expression quantitative trait locus, etc.

<sup>c</sup>without overlap



**Table 4** Numbers of polymorphic markers according to small-scale genotyping of Japanese individuals

|                        | Numbers of markers analyzed | Numbers of polymorphic markers<br>(%) |
|------------------------|-----------------------------|---------------------------------------|
| <hr/>                  |                             |                                       |
| (n = 286) <sup>a</sup> |                             |                                       |
| JPAv2 <sup>b</sup>     | 643,417                     | 639,137 (99.33)                       |
| JPA NEO <sup>b</sup>   | 659,745                     | 656,747 (99.55)                       |
| <br>                   |                             |                                       |
| (n = 191) <sup>a</sup> |                             |                                       |
| JPAv2 <sup>b</sup>     | 652,920                     | 647,995 (99.25)                       |
| ASA <sup>c</sup>       | 645,991                     | 532,647 (82.45)                       |

<sup>a</sup>used the same DNA sample set for each comparative analysis

<sup>b</sup>used the markers within the recommended probe set list created during the QC analysis

<sup>c</sup>removed tri-allelic markers and markers for missing and overlapping positions

**Table 5** Number of imputed markers (INFO score >0.8)

|                      | MAF < 1%  | $1 \leq \text{MAF} \leq 5\%$ | $5\% < \text{MAF}$ |
|----------------------|-----------|------------------------------|--------------------|
| (n= 286)             |           |                              |                    |
| JPAv2 <sup>a</sup>   | 3,605,463 | 2,237,278                    | 6,583,308          |
| JPA NEO <sup>a</sup> | 3,919,446 | 2,316,257                    | 6,639,510          |

<sup>a</sup>used the same DNA sample set for genotyping

**Table 6** Progress of genotyping TMM samples by Japonica Array as of May 2020

|                                | Passed DQC and QC call rate / Total <sup>b</sup> |                                      |
|--------------------------------|--------------------------------------------------|--------------------------------------|
|                                | (% pass rate)                                    |                                      |
|                                | Blood samples                                    | Saliva samples                       |
| Japonica Array v1 <sup>a</sup> | 2,350 / -                                        | none                                 |
| Japonica Array v2              | 100,005 / 100,166<br>(99.84%)                    | 949 / 1,056 <sup>c</sup><br>(89.87%) |
| Japonica Array NEO             | 25,982 / 26,016<br>(99.87%)                      | 768/768<br>(100%)                    |

<sup>a</sup> genotyping conducted by Toshiba Inc.

<sup>b</sup>including samples analyzed by multiple Japonica Arrays

<sup>c</sup>including one failed plate below the criteria of mean QC call rate of passed samples

**a**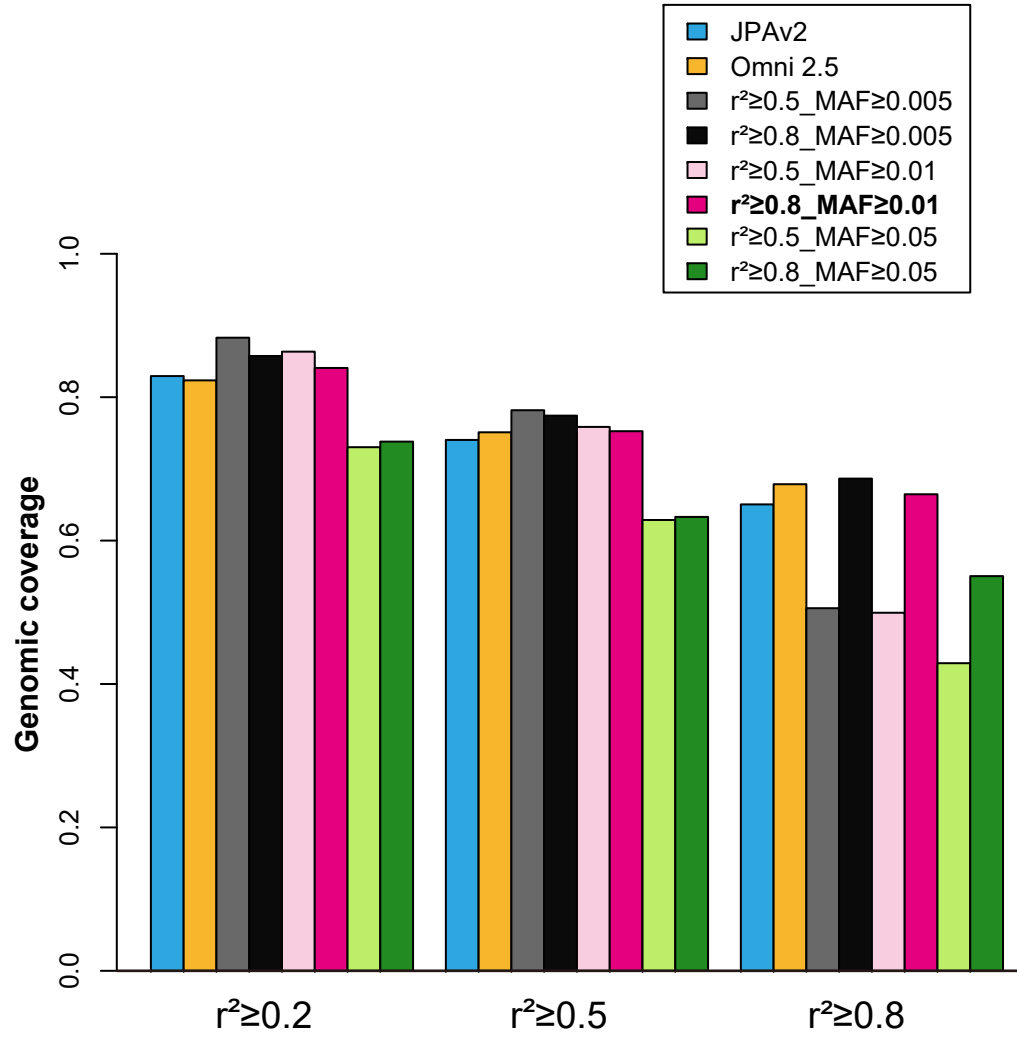**b**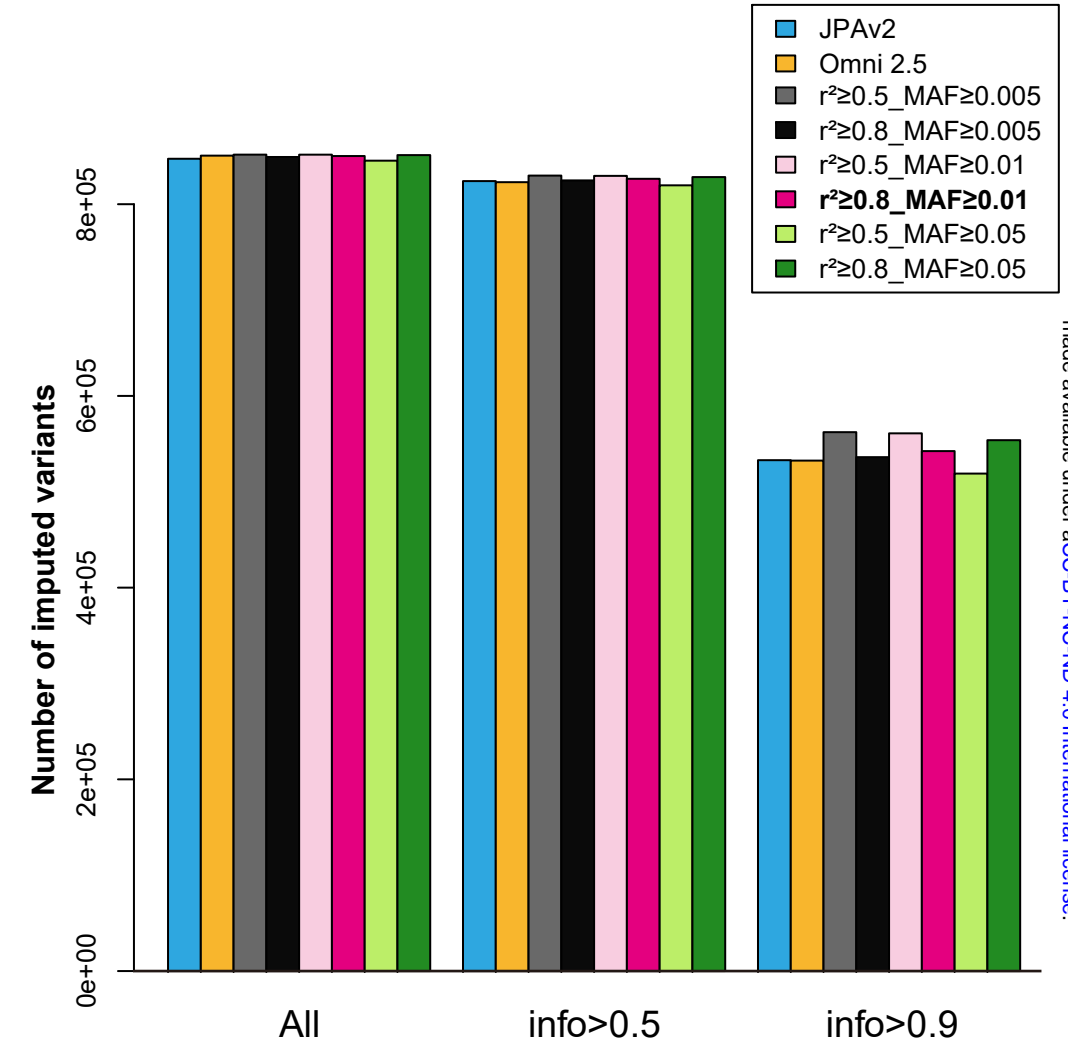**Figure 1**

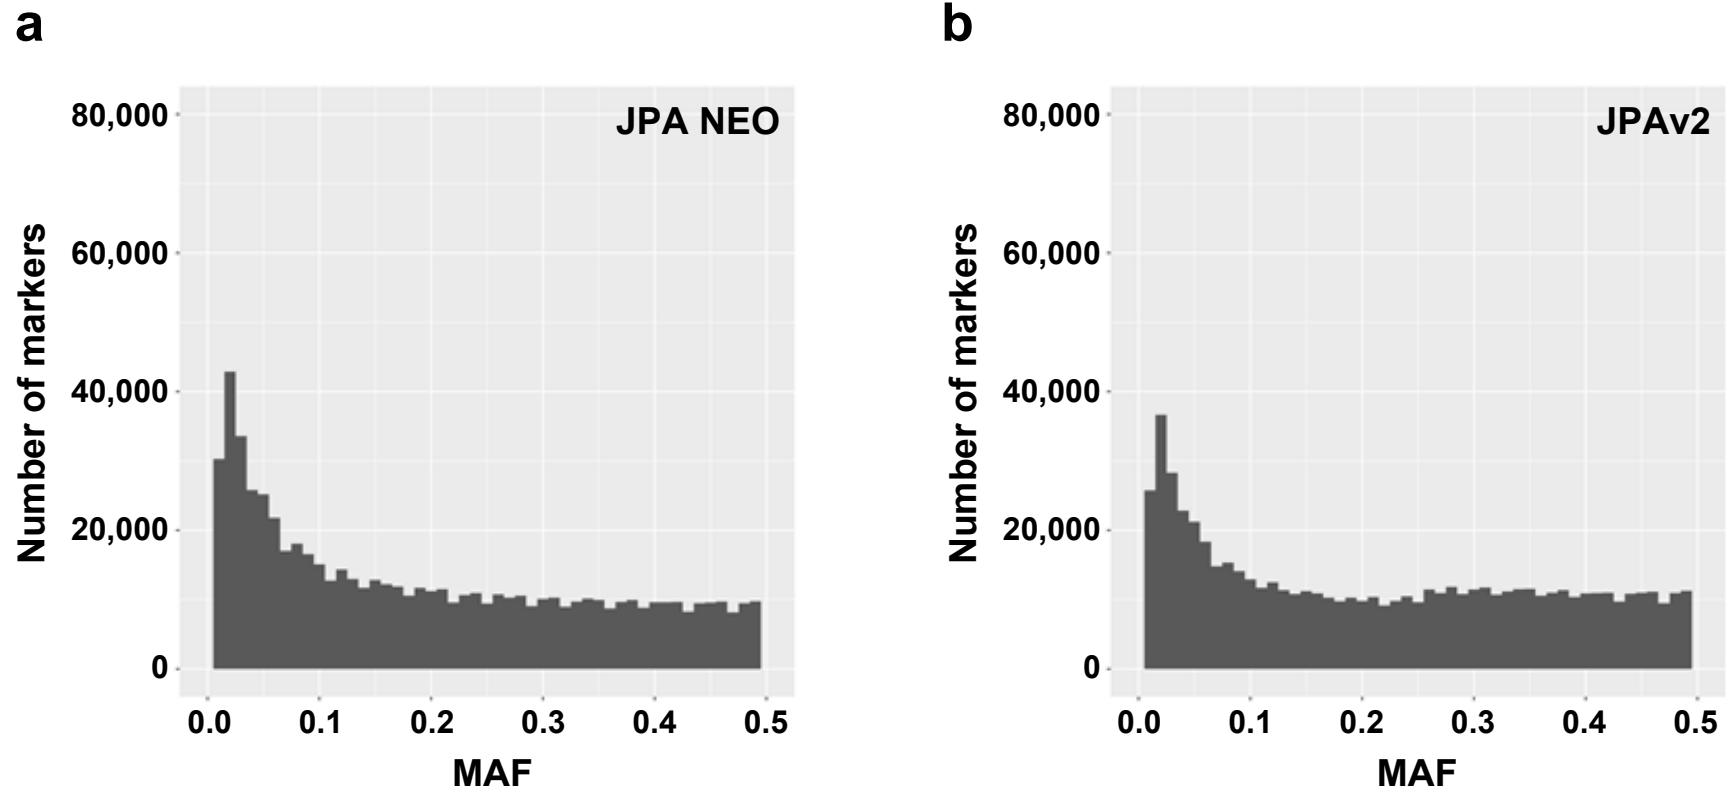

**Figure 2**

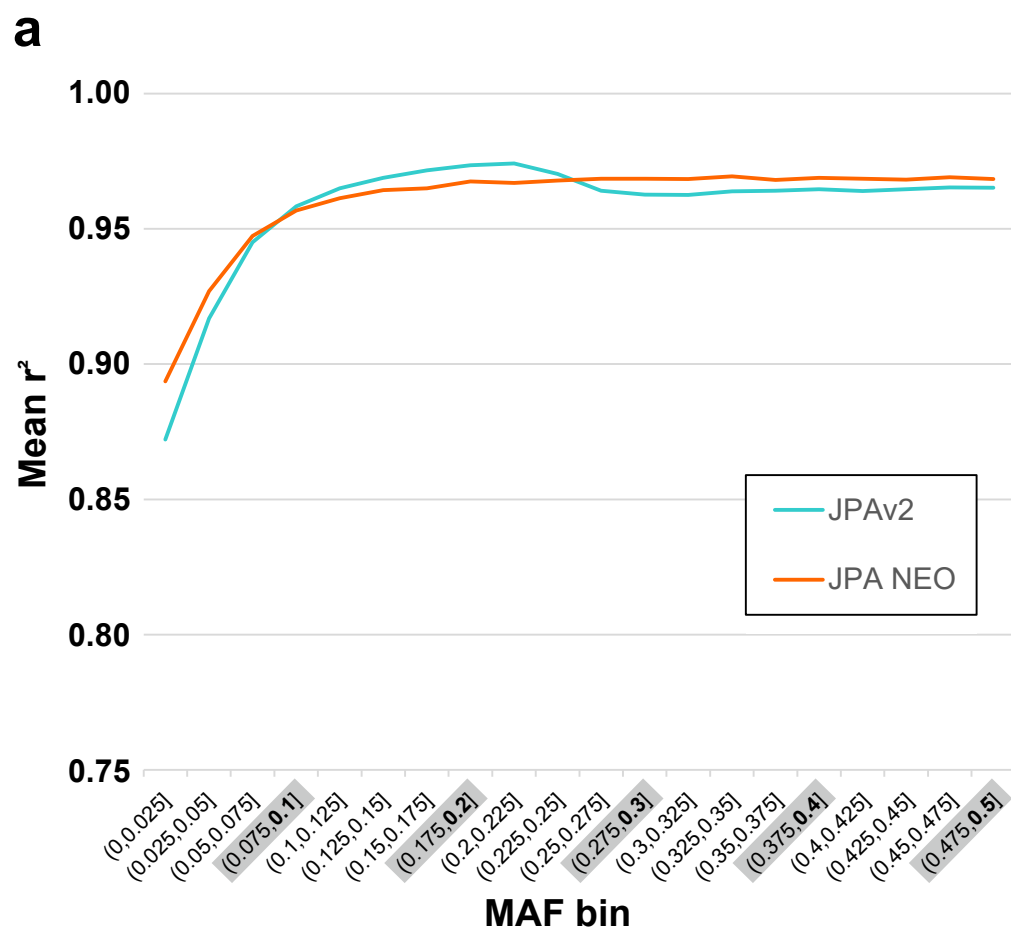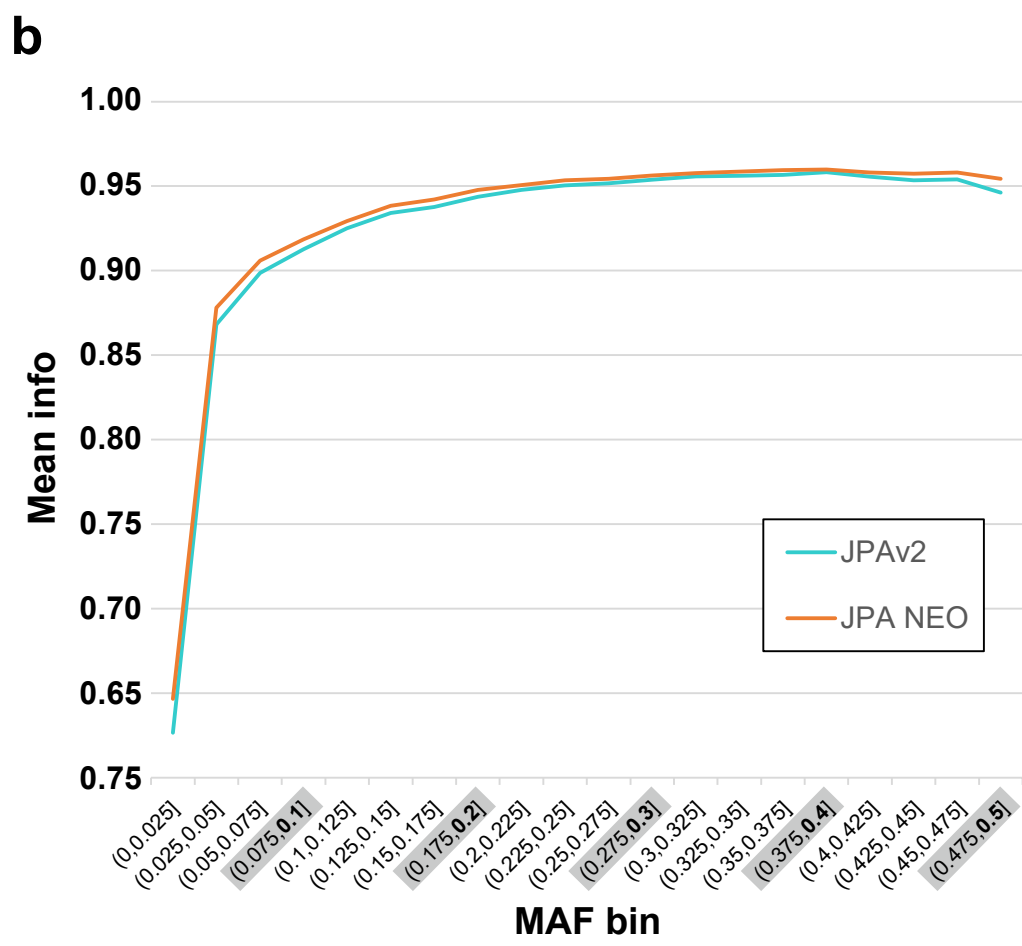

Figure 3

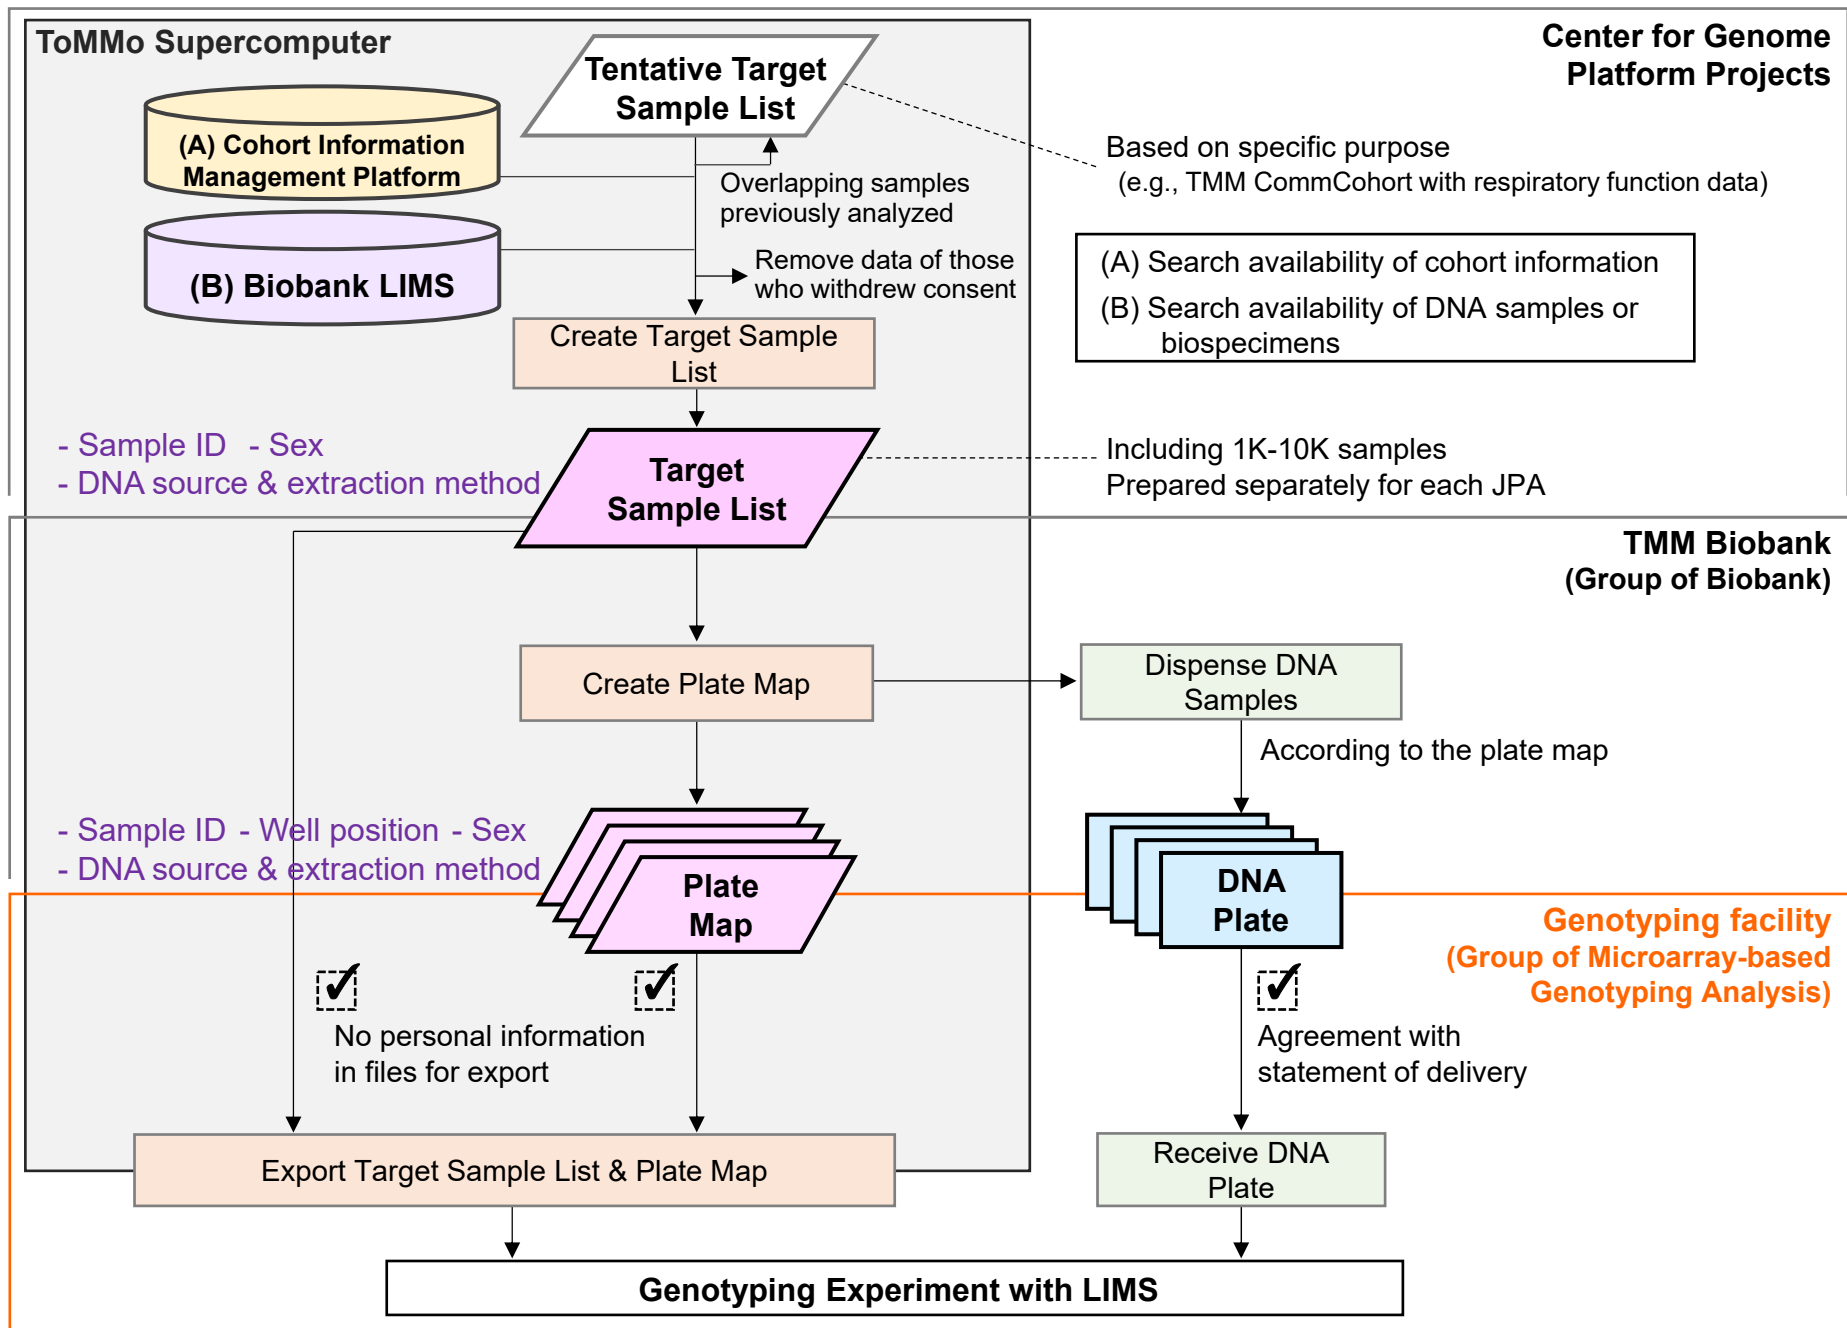

**Figure 4**
